# Supplementary material
Source: MDPI journal article supplement (https://www.mdpi.com/2071-1050/16/10/4258)
Supplement: s1 [file s1 › sustainability-2988537-supplementary.pdf]

# Utilisation of Machine Learning in Control Systems Based on the Preference of Office Users

Thayane L. Bilésimo \* and Enedir Ghisi

Laboratory of Energy Efficiency in Buildings, Research Group on Management of Sustainable Environments, Department of Civil Engineering, Federal University of Santa Catarina, Florianópolis 88040-900, Brazil;  
enedir.ghisi@ufsc.br

\* Correspondence: thayane.bilesimo@ufsc.br

## List of symbols

|       |                             |
|-------|-----------------------------|
| ↓     | Decrease                    |
| ↑     | Increase                    |
| ANN   | Artificial neural network   |
| C-SVC | C-support vector classifier |
| DT    | Decision Tree               |
| KF    | Kalman filter               |
| GNB   | Gaussian naive Bayes        |
| KNN   | k-Nearest neighbours        |
| LR    | Linear regression           |
| LogR  | Logistic regression         |
| MLP   | Multilayer perceptron       |
| RF    | Random forest               |

|                   |                           |
|-------------------|---------------------------|
| RH <sub>in</sub>  | Inside relative humidity  |
| RH <sub>out</sub> | Outside relative humidity |
| T <sub>in</sub>   | Inside temperature        |
| T <sub>out</sub>  | Outside temperature       |
| T <sub>s</sub>    | Skin temperature          |

**Table S1.** Synthesis of the main characteristics of occupant-centred systems based on users' preference.

| Reference | Scope                                                      | Duration of the study | Identification of preferences | Algorithm(s) <sup>1</sup>    | Variables                                                         | System assessment                              | Algorithm assessment (best case) | Comfort assessment                                              | Energy savings |
|-----------|------------------------------------------------------------|-----------------------|-------------------------------|------------------------------|-------------------------------------------------------------------|------------------------------------------------|----------------------------------|-----------------------------------------------------------------|----------------|
| [1]       | Control of lighting and shading systems through simulation | 1 year                | User-system interaction       | KF                           | Attendance, illuminance, tin, time, feedback on light and shading | Number of interactions and energy savings      | -                                | Interactions ↓<br>80.0–85.0%                                    | 13.6–<br>35.0% |
| [2]       | Control of the lighting system                             | 6 weeks               | User-system interaction       | Dynamic statistical analysis | Attendance, illuminance, switch position, time                    | Energy savings                                 |                                  | -                                                               | 23.2–<br>73.2% |
| [3]       | Control of the lighting system                             | 12 weeks              | User-system interaction       | Dynamic statistical analysis | Attendance, illuminance, switch position, time                    | Number of interactions and users' satisfaction | -                                | 18.1% of contested actions, in average + qualitative assessment | -              |

<sup>1</sup> For those papers that compared the algorithms' performance, the best result is in bold.

|     |                                         |         |                         |                    |                                                                                                                                    |                                                  |       |                                  |          |
|-----|-----------------------------------------|---------|-------------------------|--------------------|------------------------------------------------------------------------------------------------------------------------------------|--------------------------------------------------|-------|----------------------------------|----------|
| [4] | Control of the lighting system          | 10 days | Vote                    | Q-Learning         | Illuminance, feedback on light                                                                                                     | Users' satisfaction and energy savings           | -     | 92.0% of acceptability           | 10%      |
| [5] | Control of HVAC and lighting systems    | 1 year  | Vote                    | Clustering         | Tin, illuminance, attendance, feedback on light and temperature                                                                    | Users' satisfaction and energy savings potential | -     | 78.0% of satisfaction            | 27–39.0% |
| [6] | Control of lighting and shading systems | 1 year  | User-system interaction | LogR               | Switch position, shading position, attendance, illuminance, irradiance                                                             | Number of interactions                           | -     | 6.0% - 8.0% of contested actions | -        |
| [7] | Control of the HVAC system              | 3 weeks | Vote                    | LogR, KNN, RF, SVM | Heart rate, Ts, tin, tout, RHin, RHout, CO2, openings status, illuminance, noise, feedback on set point temperature and preference | Accuracy                                         | 80.0% | -                                | -        |
| [8] | Control of the HVAC system              | 1 year  | User-system interaction | LogR               | tin, tout, RHin, RHout, attendance, thermostat interaction                                                                         | Number of interactions                           | -     | Interactions ↓ ~87.0%            | -        |

|      |                                               |                     |                         |                     |                                                                            |                                                         |       |                                                      |                                             |
|------|-----------------------------------------------|---------------------|-------------------------|---------------------|----------------------------------------------------------------------------|---------------------------------------------------------|-------|------------------------------------------------------|---------------------------------------------|
| [9]  | Control of the HVAC system                    | ~ 3 months (summer) | Vote                    | ANN                 | Tin, CO2, RHin, light, air pressure and feedback on temperature            | Energy savings and comfort                              | -     | No change                                            | 20–40.0%                                    |
| [10] | Control of the HVAC system through simulation | 1 month (winter)    | Vote                    | k-means             | Attendance, feedback on temperature                                        | Energy savings and comfort                              | -     | 70.8–73.6%                                           | 8.4–26.8%                                   |
| [11] | Control of the HVAC system                    | 5 months            | User-system interaction | GNB, DT, C-SVC, MLP | Time, tin, tout, attendance, setpoint temperature                          | Accuracy and number of interactions                     | 97.3% | Interactions ↓ aabout75%                             | 4.0–25.0%                                   |
| [12] | Control of the lighting system                | 2 months            | User-system interaction | Q-Learning          | Illuminance, switch position, attendance, time                             | LUR, UNC, LCR <sup>2</sup> , user satisfaction          | -     | Qualitative assessment                               | -                                           |
| [13] | Control of the HVAC system                    | 6 days              | Vote                    | LR                  | Tin, tout, RHin, RHout, Ts, heart rate, feedback on thermal satisfaction   | Users' satisfaction and energy savings                  | -     | Rate: 5.56/7.0                                       | 13.8%                                       |
| [14] | Control of the HVAC system through simulation | 3 weeks             | Vote                    | ANN                 | Tin, RHin, pulse temperature, heart rate and feedback on thermal sensation | R <sup>2</sup> , users' satisfaction and energy savings | 0.89  | ↑ 85.0–100.0% of thermal sensation votes for comfort | ↓ thermal load: 90.0% heating 30.0% cooling |

<sup>2</sup> Light utilisation ratio, unmet comfort ratio, lights to comfort ratio

|      |                                                                  |         |                         |                                    |                                                                                                                        |                                           |                |                            |            |
|------|------------------------------------------------------------------|---------|-------------------------|------------------------------------|------------------------------------------------------------------------------------------------------------------------|-------------------------------------------|----------------|----------------------------|------------|
| [15] | Control of the lighting system                                   | 1 day   | Vote                    | ANN                                | Illuminance, attendance                                                                                                | Accuracy and users' satisfaction          | 88.5%          | 86.4% satisfaction         | -          |
| [16] | Control of the HVAC system through simulation                    | 1 year  | User-system interaction | Q-Learning                         | Attendance, tin, feedback on thermal sensation                                                                         | Number of interactions                    | -              | "too hot" feedback ↓ 40.0% | -          |
| [17] | Control of HVAC, lighting and shading systems through simulation | 3 years | User-system interaction | Dynamic statistical analysis, LogR | Attendance, illuminance, tin                                                                                           | Number of interactions and energy savings | -              | Many scenarios             |            |
| [18] | Control of the HVAC system through simulation                    | 10 days | User-system interaction | ANN                                | Tin, RHin, set point temperature                                                                                       | MAE <sup>3</sup> , RMSE                   | 0.5°C<br>0.6°C | -                          | -          |
| [19] | Control of the HVAC system                                       | 9 days  | Vote                    | LR                                 | Tin, tout, RHin, RHout, CO2, Ts, heart rate, set point temperature, feedback on thermal sensation, satisfaction and RH | Users' satisfaction and energy saving     | -              | Rates: 5.2/7.0 and 5.3/7.0 | 10.0–20.0% |

---

<sup>3</sup> Mean absolute error

|      |                            |          |                         |                                     |                                                                                                   |                                                  |              |                       |            |
|------|----------------------------|----------|-------------------------|-------------------------------------|---------------------------------------------------------------------------------------------------|--------------------------------------------------|--------------|-----------------------|------------|
| [20] | Control of the HVAC system | 4 months | User-system interaction | MLP                                 | Tin, tout, RHin,, RHout, set point temperature                                                    | MSE <sup>4</sup>                                 | 0.28         | -                     |            |
| [21] | Control of the HVAC system | 2 weeks  | Vote                    | Branching dueling Q-network         | Tin, tout, RHout, solar radiation, attendance, time, HVAC energy consumption, feedback on comfort | Users' satisfaction and energy savings           | -            | Acceptability ↑ 11.0% | 13.9%      |
| [22] | Control of the HVAC system | 16 days  | Vote                    | RF, SVM, DT, gradient boosting, ANN | Time, tin, RHin, heart rate, feedback on thermal sensation vote                                   | Accuracy, users' satisfaction and energy savings | 88.2%        | Discomfort ↓ 33.0%    | 27.0%      |
| [23] | Control of the HVAC system | 21 days  | Vote                    | Reinforcement learning-based        | Tin, RHin, heart rate, Ts, feedback on thermal sensation                                          | Users' satisfaction and energy savings           | Optimisation | Discomfort ↓ 10.9%    | No change  |
| [24] | Control of the HVAC system | 8 days   | Vote                    | Multinomial LogR                    | Tin, tout, RHin,, irradiance, feedback on thermal preference                                      | Users' satisfaction and energy savings           | -            | No change             | 28.0–35.0% |

---

<sup>4</sup> Mean square error

|      |                               |            |      |                           |                                                                                     |                                        |       |                             |          |
|------|-------------------------------|------------|------|---------------------------|-------------------------------------------------------------------------------------|----------------------------------------|-------|-----------------------------|----------|
| [25] | Control of the HVAC system    | 90 minutes | Vote | RF                        | Tin, RHin, Ts, metabolism, feedback on thermal acceptability, comfort and sensation | Accuracy and users' satisfaction       | 84.0% | 80% of acceptability        | -        |
| [26] | Simulation of the HVAC system | 1 year     | Vote | Extreme gradient boosting | Tin, tout, RHin,,                                                                   | Users' satisfaction and energy savings | -     | 98.3–99.5% of acceptability | 4.6–3.5% |

## References

1. Gunay, H.B.; O'Brien, W.; Beausoleil-Morrison, I.; Huchuk, B. On Adaptive Occupant-Learning Window Blind and Lighting Controls. *Build. Res. Inf.* **2014**, *42*, 739–756. <https://doi.org/10.1080/09613218.2014.895248>.
2. Nagy, Z.; Yong, F.Y.; Frei, M.; Schlueter, A. Occupant Centered Lighting Control for Comfort and Energy Efficient Building Operation. *Energy Build.* **2015**, *94*, 100–108. <https://doi.org/10.1016/J.ENBUILD.2015.02.053>.
3. Nagy, Z.; Yong, F.Y.; Schlueter, A. Occupant Centered Lighting Control: A User Study on Balancing Comfort, Acceptance, and Energy Consumption. *Energy Build.* **2016**, *126*, 310–322. <https://doi.org/10.1016/J.ENBUILD.2016.05.075>.
4. Cheng, Z.; Zhao, Q.; Wang, F.; Jiang, Y.; Xia, L.; Ding, J. Satisfaction Based Q-Learning for Integrated Lighting and Blind Control. *Energy Build.* **2016**, *127*, 43–55. <https://doi.org/10.1016/j.enbuild.2016.05.067>.
5. Sarkar, C.; Nambi, A.U.; Prasad, V. ILTC: Achieving Individual Comfort in Shared Spaces. In Proceedings of the 2016 International Conference on Embedded Wireless Systems and Networks, Graz, Austria, 15–17 February 2016; pp. 65–76.
6. Gunay, H.B.; O'Brien, W.; Beausoleil-Morrison, I.; Gilani, S. Development and Implementation of an Adaptive Lighting and Blinds Control Algorithm. *Build. Environ.* **2017**, *113*, 185–199. <https://doi.org/10.1016/j.buildenv.2016.08.027>.
7. Li, D.; Menassa, C.C.; Kamat, V.R. Personalized Human Comfort in Indoor Building Environments under Diverse Conditioning Modes. *Build. Environ.* **2017**, *126*, 304–317. <https://doi.org/10.1016/J.BUILDENV.2017.10.004>.
8. Gunay, H.B.; O'Brien, W.; Beausoleil-Morrison, I.; Bursill, J. Development and Implementation of a Thermostat Learning Algorithm. *Sci. Technol. Built Environ.* **2018**, *24*, 43–56. <https://doi.org/10.1080/23744731.2017.1328956>.
9. Rajith, A.; Soki, S.; Hiroshi, M. Real-Time Optimized HVAC Control System on Top of an IoT Framework. In Proceedings of the 2018 Third International Conference on Fog and Mobile Edge Computing (FMEC), IEEE, Barcelona, Spain, 23–26 April 2018; pp. 181–186.

10. Peng, Y.; Nagy, Z.; Schlüter, A. Temperature-Preference Learning with Neural Networks for Occupant-Centric Building Indoor Climate Controls. *Build. Environ.* **2019**, *154*, 296–308. <https://doi.org/10.1016/J.BUILDENV.2019.01.036>.
11. Peng, Y.; Nagy, Z.; Schlüter, A. Temperature-Preference Learning with Neural Networks for Occupant-Centric Building Indoor Climate Controls. *Build. Environ.* **2019**, *154*, 296–308. <https://doi.org/10.1016/J.BUILDENV.2019.01.036>.
12. Park, J.Y.; Dougherty, T.; Fritz, H.; Nagy, Z. LightLearn: An Adaptive and Occupant Centered Controller for Lighting Based on Reinforcement Learning. *Build. Environ.* **2019**, *147*, 397–414. <https://doi.org/10.1016/J.BUILDENV.2018.10.028>.
13. Li, W.; Zhang, J.; Zhao, T. Indoor Thermal Environment Optimal Control for Thermal Comfort and Energy Saving Based on Online Monitoring of Thermal Sensation. *Energy Build.* **2019**, *197*, 57–67. <https://doi.org/10.1016/j.enbuild.2019.05.050>.
14. Deng, Z.; Chen, Q. Development and Validation of a Smart HVAC Control System for Multi-Occupant Offices by Using Occupants' Physiological Signals from Wristband. *Energy Build.* **2020**, *214*, 109872. <https://doi.org/10.1016/j.enbuild.2020.109872>.
15. Mandaric, K.; Skocir, P.; Jezic, G. Context-Based System for User-Centric Smart Environment. In Proceedings of the 2020 International Conference on Software, Telecommunications and Computer Networks (SoftCOM), IEEE, Hvar, Croatia, 17–19 September 2020; pp. 1–5.
16. Park, J.Y.; Nagy, Z. HVACLearn: A Reinforcement Learning Based Occupant-Centric Control for Thermostat Set-Points. In Proceedings of the e-Energy 2020: 11th ACM International Conference on Future Energy Systems, Virtual Event Australia, 22–26 June 2020; Association for Computing Machinery, Inc.: New York, NY, USA, 2020; pp. iii–iv.
17. Ouf, M.M.; Park, J.Y.; Gunay, H.B. A Simulation-Based Method to Investigate Occupant-Centric Controls. *Build. Simul.* **2020**, *14*, 1017–1030. <https://doi.org/10.1007/s12273-020-0726-y>.
18. Laftchiev, E.; Romeres, D.; Nikovski, D. Personalizing Individual Comfort in the Group Setting. *Proc. AAAI Conf. Artif. Intell.* **2021**, *35*, 15339–15346. <https://doi.org/10.1609/AAAI.V35I17.17801>.
19. Li, W.; Zhang, J.; Zhao, T.; Ren, J. Experimental Study of an Indoor Temperature Fuzzy Control Method for Thermal Comfort and Energy Saving Using Wristband Device. *Build. Environ.* **2021**, *187*, 107432. <https://doi.org/10.1016/j.buildenv.2020.107432>.
20. Zhu, M.; Pan, Y.; Wu, Z.; Xie, J.; Huang, Z.; Kosonen, R. An Occupant-Centric Air-Conditioning System for Occupant Thermal Preference Recognition Control in Personal Micro-Environment. *Build. Environ.* **2021**, *196*, 107749. <https://doi.org/10.1016/J.BUILDENV.2021.107749>.
21. Lei, Y.; Zhan, S.; Ono, E.; Peng, Y.; Zhang, Z.; Hasama, T.; Chong, A. A Practical Deep Reinforcement Learning Framework for Multivariate Occupant-Centric Control in Buildings. *Appl. Energy* **2022**, *324*, 119742. <https://doi.org/10.1016/j.apenergy.2022.119742>.
22. Jeoung, J.; Jung, S.; Hong, T.; Choi, J.-K. Blockchain-Based IoT System for Personalized Indoor Temperature Control. *Autom. Constr.* **2022**, *140*, 104339. <https://doi.org/10.1016/j.autcon.2022.104339>.
23. Jung, S.; Jeoung, J.; Hong, T. Occupant-Centered Real-Time Control of Indoor Temperature Using Deep Learning Algorithms. *Build. Environ.* **2022**, *208*, 108633. <https://doi.org/10.1016/J.BUILDENV.2021.108633>.
24. Zhang, H.; Tzempelikos, A.; Liu, X.; Lee, S.; Cappelletti, F.; Gasparella, A. The Impact of Personal Preference-Based Thermal Control on Energy Use and Thermal Comfort: Field Implementation. *Energy Build.* **2023**, *284*, 112848. <https://doi.org/10.1016/j.enbuild.2023.112848>.
25. Wu, Y.; Cao, B.; Hu, M.; Lv, G.; Meng, J.; Zhang, H. Development of Personal Comfort Model and Its Use in the Control of Air Conditioner. *Energy Build.* **2023**, *285*, 112900. <https://doi.org/10.1016/j.enbuild.2023.112900>.
26. Tekler, Z.D.; Lei, Y.; Dai, X.; Chong, A. Enhancing Personalised Thermal Comfort Models with Active Learning for Improved HVAC Controls. *J. Phys. Conf. Ser.* **2023**, *2600*, 132004. <https://doi.org/10.1088/1742-6596/2600/13/132004>.
